# Supplementary material for: Effectiveness of physical activity on immunity markers and quality of life in cancer patient: a systematic review
Source: PeerJ. 2022 Aug 2;10:e13664. doi: 10.7717/peerj.13664 (PMC9354736; doi:10.7717/peerj.13664)
Supplement: Data S1 [file peerj-10-13664-s004.xlsx]

## Sheet: Sheet1
	Journal	Population	Year of publication	Sample Size	cancer Type	gender	Method ( exercise name,duration, intensity, sets,reps.	Timing of intervention	duration of the study	#NAME?	immunity and qouality of life parameter or Immune component examined	Results	Conclusion	desing of the study
1. (Galvao et al., 2010)	JOURNAL OF CLINICAL ONCOLOGY	Australian	2010	57 E g= 29 Co =28	Prostat	Male	patients undergo combined progressive AE and RT, RT included (upper- and lower-body 8 EX, 2-4 sets, 12-6RM & AE ( Progressive cycling and walking 2/w) 15-20 min, 65-80% HRpeak and 11-13 RPE	more than 2 MO after starting with Androgen deprivation therapy	12 W		GN= general health; F C-RP	EX, enhanced various QOL including overall health and decreased tiredness and lower C-RP levels. No adverse events were recorded	EX resulted in improvement for muscle mass, muscular strength, physical function and balance. These improvements have been accompanied by improved well-being for patients and the overall QOL, the CRP significantly dicreased foolowing exercise	RCT
2. (Hojan et al., 2016)	European Journal of Physical and Rehabilitation Medicine	Poland	2016	54 Eg=27 CO =27	prostat ( high risk)	Male	the interventio group undergo AE for 30 m and 15 m of RT ( sets of 8 reps at 70% to 75% of their estimated (1RM). Both EX were about 50 to 55 M at 65-70% VO2M for ive days per. The CO resived only usual care.	EX started one W befor radiotherapy	8 w		TNF-α, pro-inflammatory cytokines (interleukin [IL]-1β, IL-6, fatigue, and QoL	significantly decreased in pro-inflammatory cytokine levels, F, improve in functional capacity, Physical well-being, Emotional well-being, Functional well-being. While no significant in Social/family well-being was found. After RT, the intervention group show a tendency of smaller increases in IL-6 and TNF- levels, as well as minor reductions in IL-1β levels	Physical activity at a moderate intensity increases functional ability, improce inflammation markers (by decreasing their levels), and dicrease fatigue, and improves QoL in high-risk PC patients after radiation therapy. findings revealed a substantial reduction in blood count (red blood cells, white blood cells, haemoglobin, and lymphocytes) following treatment, suggesting that exercise training …	a prospective, two-arm randomized controlled clinical trial
3.(Hojan et al., 2017)	The National Center for Biotechnology Information advances science and health by providing access to biomedical and genomic information.	Poland	2017	66 Male, Eg=35 CO =31	prostate cancer ( high risk)	Male	All the Intervention group undergo AE; 5 /S /w for 8 weeks (during radiation therapy), and 3 d/w for the next 10 months for 30 M & RT; (2 sets of 8 reps at 70% to 75% f0r 25 M of their estimated (1RM). Both EX was about 65 to 70 M. with 65% to 70% VO2M.After radiation therapy, the intervention group did same program 3/w but 1.5 H/D. 40 M of AE & 35M of RT. with 70% to 80% of heart rate reserve. T…	during and after radiotherap and androgen deprivation therapy	12‑ M0		inflammatory factors, FACT‑G score, and QLQ‑C30	EX significantly reduse pro-inflammatory cytokine levels and improve all the espect of QOL ( FACT-F and FACT‑G scores, physical well being, social/family well being, emotional well being, functional well being and fatigue) as well as Significant improvement in QLQ C30 ( physical functioning, emotional functioning, cognitive functioning, F and appetite loss) no significant difference in IL¬ 1β. IL…	EX has been shown to have a substantial impact on physical activity as well as improving QOL and reducing pro-inflammatory cytokine levels in patients with PC undergoing radiotherap and androgen deprivation therapy .	RCT
4. (Chasen et al., 2013)	Current Oncology	Canada	2013	116	Diffrents type of cancer. Head and neck = 11 Breast = 9 ,Hematologic= 8, Non small cell lung = 7, Small cell lung= 2 , Colorectal =5, Prostate= 3, Liverbile duct =2 , Esophageal = 2 Central nervous system=2, Skin =2 Unknown primary= 2, Urogenital =1, Hodgkin lymphoma=1	Male and female	67 participated the 8-w EX program, and engaged in Rehab program for 8 W at the hospital gym 2D/ W under the direction of an Occupational Therapist	after anticancer therapy	8w		Esas, CRP, and White blood cell	There is a significant relationship between normal serum crp and program completion. Sgnificant improvement in Esas. substantial improvements in QOL, physical performance, nutrition, symptom severity, symptom interference with functioning, fatigue, physical endurance, mobility, and balance or function	As a result of the Palliative Rehabilitation Program, patients with advanced different type of cancers showed considerable improvements in functioning across a number of categories. The study concluded that a normal amount of C-reactive protein can indicate program completion. the study also obsorved imptovment in QOl.	******
5. (Sprod et al., 2010)	Community Oncol	United States	2010	38 Eg= 19 co= 19	Prostat and breast	Male and femal	AE: (walking ) increasing with 5-20% of steps at 3-5 RPE & RT: 11 EX, increasing towards 4 sets 15 reps Res: Low to modiret intensity. Patients were engaged in daily EX.	following primary diagnosis, starting radiotherap of at least 6 weeks	4W		PSQI scores, IL-6p, IL-6s,TNF-α, and sTNF-R	greater improvement in sleep quality following EX, IL-6p, IL-6s,TNF-α were increased while , sTNF-R dicreased	Changes in sleep measurements and changes in inflammatory markers were not associated in the intervention group. according to the study's results an relationship was found between TNF-α and subjective sleep quality as well as TNF-α sleep delay, patients had a better Subjective sleep quality and sleep efficiency were linked with higher levels of sTNF-R and IL-6p, respectively.	pilot study
6. (Kim et al., 2018)	Thyroid	Korea	2018	43, Eg= 22 CO=21	thyroid cancer	Male and female	Patents were asked to perform AE (walking, 3-5 D/W for at least 150 M/W. & RT (upper body EX 2/W for more than 2 sets/ times. & flexibility EX (5 M before and after AE and and RT. 30-40 M of EX were considered appropriate.	during taking thyroid hormone medicine	12 W		HADS-A, EORTC QLQ-C30, NKCA and NKCC	significant dicrease in F and anxiety levels following EX intervention in patients compaer to the CO group. QoL , Symptom scales/items and Overall health QoL (global health status/QoL) in EX group were increased significantly compaer to the CO. NKCA cytotoxicity in the intervention group was increased significantly while it dicreaase in the CO group. NK cell levels in the intervention group were …	The study concluded that, In thyroid cancer patients, a home-based EX program is beneficial in lowering F and anxiety, enhancing quality of life, and boosting immunological function. As a result, a home-based EX program can be implemented as an intervention for cancer patients to enhance all of the above parameters	quasi-experimental study with a non-equivalent control group
7. (Ergun et al., 2013)	European Journal of Cancer Care	Turkey	2013	60	breast	female	patients were divided into three groups: 1 – Supervised EX group (AE + RT + education programme, n = 20); performed 45 min/day for 3 D/W under the direction of a professional doctor. 2 – Home exercise group (AE + education programme, n = 20); performed brisk walking for 30 M/D for 3 A/W. groups 1 and 2 undergo 12- W of EX. Group 3 – education programme (n = 20). followed up for 12 weeks.	following breast cancer treatments.	12 W		IL-8 and IL-8, TNF-α, ENA-78, VEGF, GRO, regulated upon activation, RANTES, ANG, PDGF, TRO, oncostatin M, MCP1, MCP2 and MCP3. EORTC QLQ-C30, BFI and BDI before (week 0) and after (week 12)	post-treatment interleukin-8, and ENA-78 levels significantly decrease in the home EX group, and MCP 1 levels significantly increase in the education group. BDI score was significantly dicrease following the EX.	the study concluded that, EX-induced changes in angiogenesis and apoptosis-related molecules imply that these parameters may be affected by EX. EX programs are safe and beneficial in improving QOL and reducing depression in breast cancer patients who have completed their treatments. Patients who are physically active should maintain their exercise practices before being diagnosed, while those who…	as a prospective, randomised, controlled study
8. (Baumann et al., 2010)	Bone Marrow Transplantation	Germany		64 EX= 32 CO= 32	malignant with the indication haematopoietic	Male and female	Eg undergo aerobic endurance training 2/D on a bicycle ergometer 10 M to 20 M during hospitalization up to a heart rate of 180 M the patient’s age& activities of daily living include Walking on the hospital’s corridor every day (except weekend). Cg undergo 20 M/D under the professional therapist at all times.	6 days before transplant	approximately 6 W		EORTC QLQ-C30, haematological parameters (leucocytes, plts, Hb)	All haematological measures show statistically significant intra differences group . significant differences in favour of the EX group concerning the strength, endurance, and QOl.	the study cocluded thatEX treatments might have some favorable impacts on the patient's physiological, psychological, and psychosocial levels during the full duration of the Hematopoietic stem cell transplant.During the EX-period, the majority of the patients were found to have steady neutrophil engraftment. Patient's who underwent hematopoietic stem cell transplantation were not exposed to any f…	a controlled randomized study pilot study
9. (Parent-Roberge et al., 2020)	Brain, Behavior, and Immunity - Health (BBI - Health)	Canada		20 EX=10 CO= 10	non-metastatic cancer		Eg undergo combined AE and RT within the same S, AE was 20 to 40 M (+5 M of warm-up and 5 Mof cool-down with 50% to 75% intensity of estimated heart rate reserve (maximal heart rate estimated & RT intensity progressed was from 1 set of 12–15 reps to 2–3 sets of 10–15 RM. Patents participated 3 S/ W, with 2 S under the supervision of the EX physiologists. While the CO performed 2/s/W of supervised…	during chemotherapy	12W		Inflammatory profile ( pro-inflammatory cytokines (IL-6 and IL-1β), anti-inflammatory cytokines (IL-10, IL-1ra and IL-15), (CRP) and inflammatory-associated adipokines (leptin and adiponectin). The IL-6/IL-1ra ratio, IL-6/IL-10 ratio, IL-1β/IL-1ra ratio and leptin/adiponectin ratio were also computed as pro-inflammatory markers), FACIT-F questionnaire and PASE questionnaire	The intervention group showed no deterioration of the inflammatory profile and cancer-related fatigue following the intervention. A decline in the CRP was observed in the intervention group. there was a Significant association between the delay separating post-intervention and the prior chemotherapy treatment received, and the Kynurenine to Tryptophan ratio.as well as IL-1β/IL-1ra. associations r…	The study concluded that ,in a breast cancer patients undergoing chemotherapy, no rise in pro-inflammatory markers was shown, exercise had a favorable effect on cancer related fatigue and pain. Exercise might be a apositve factors to improve QOL and dicrease fatigue. For cancer patients in the early stages of therapy, combined exercise training appears to have a beneficial effect on cancer relate…	) pilot study, a single-blind, two arms randomized controlled study
